# Supplementary material
Source: Elsevier journal article supplement (https://authors.library.caltech.edu/41961/8/mmc2.pdf)

**Supplementary Figure 1**

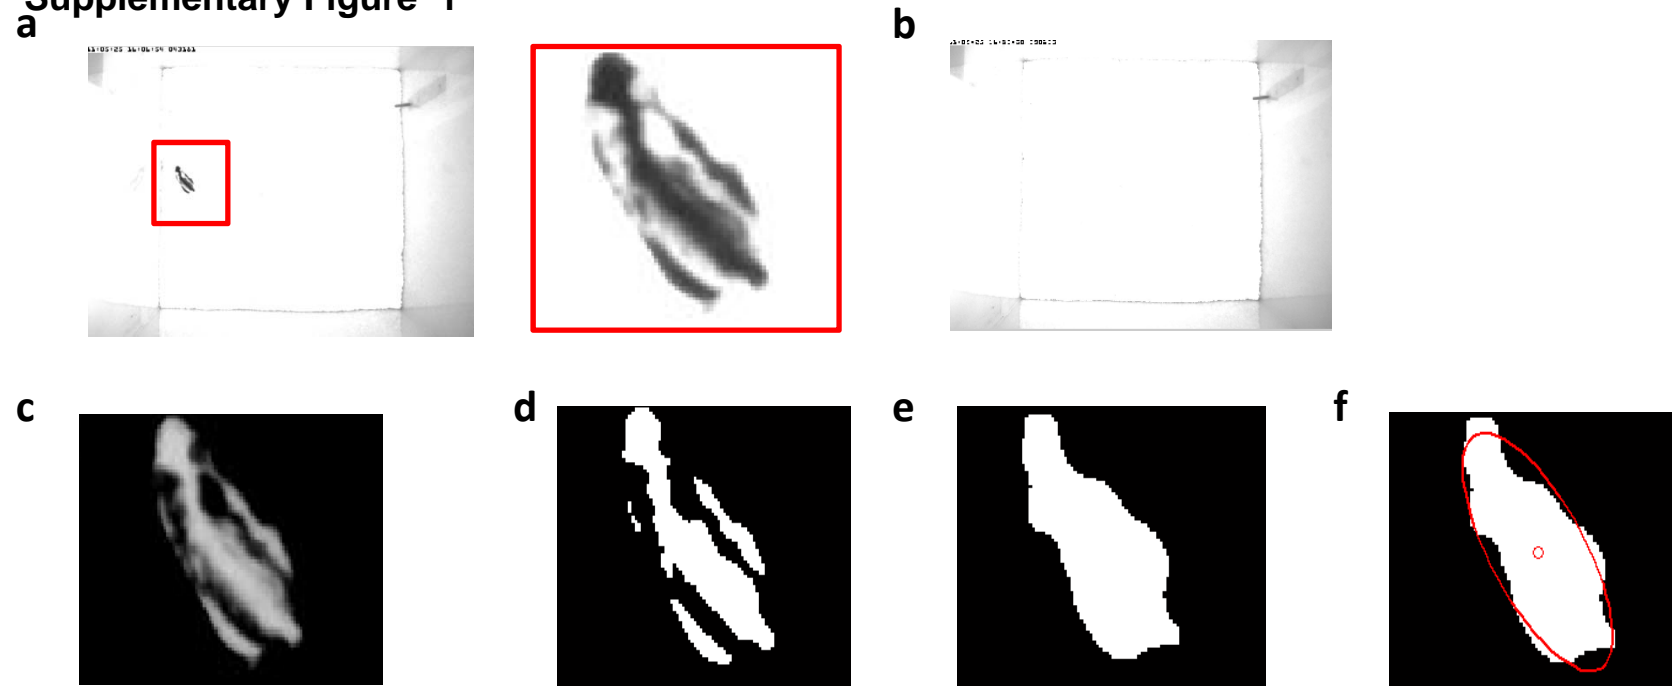

## Supplementary Figure 2

**a**

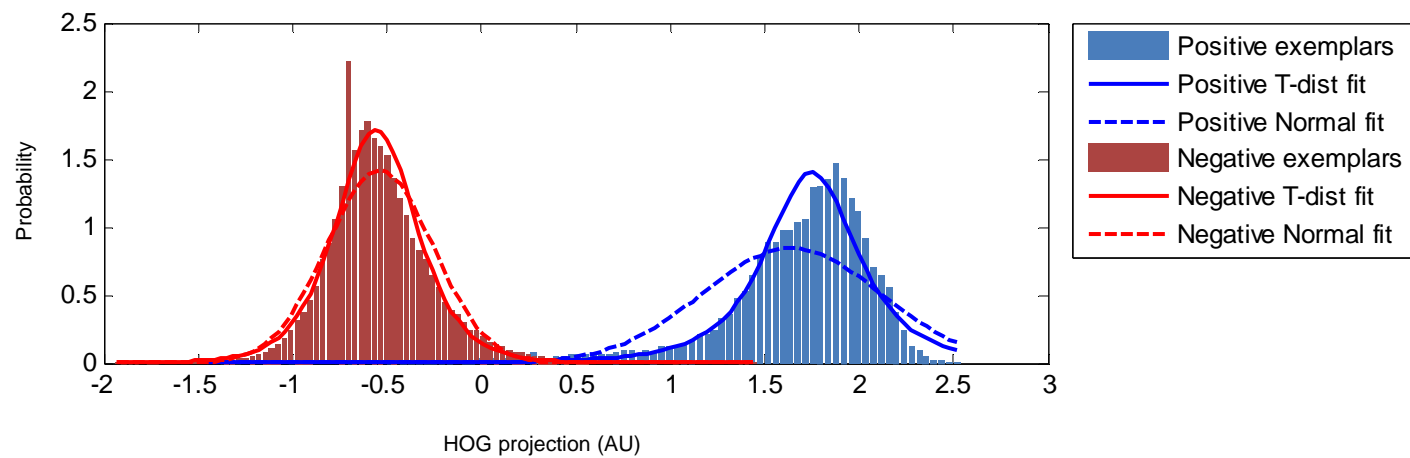

**b**

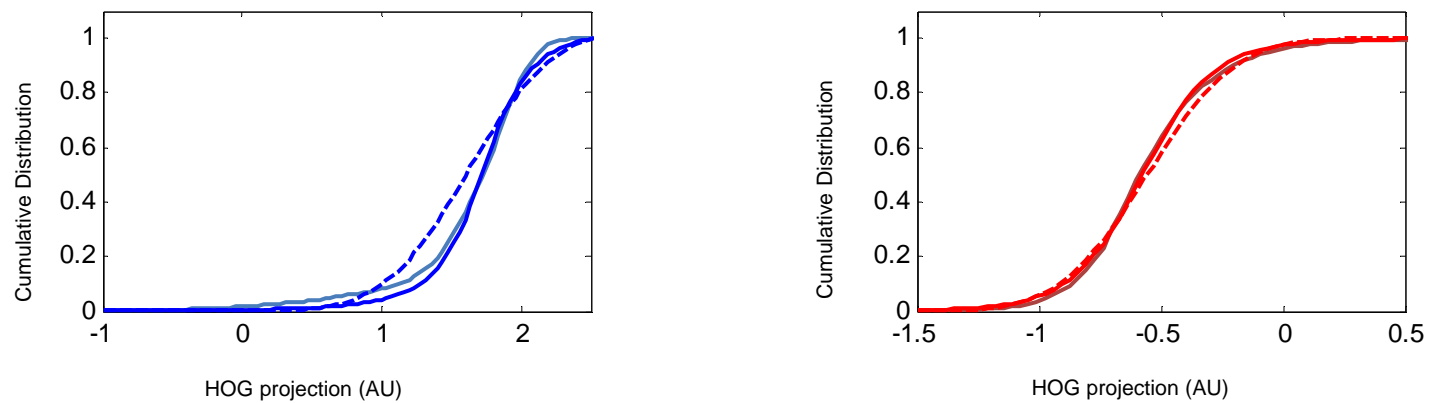

### Supplementary Figure 3

**a**

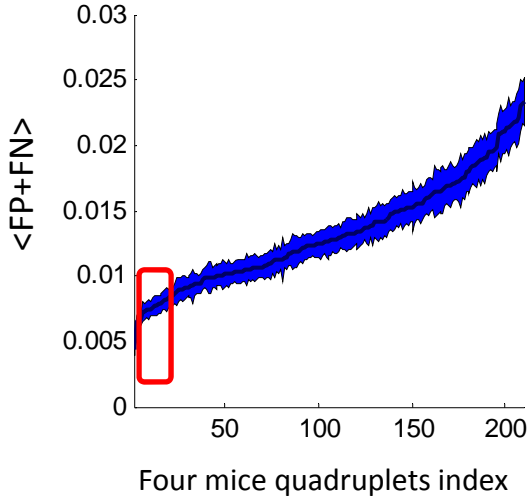**b**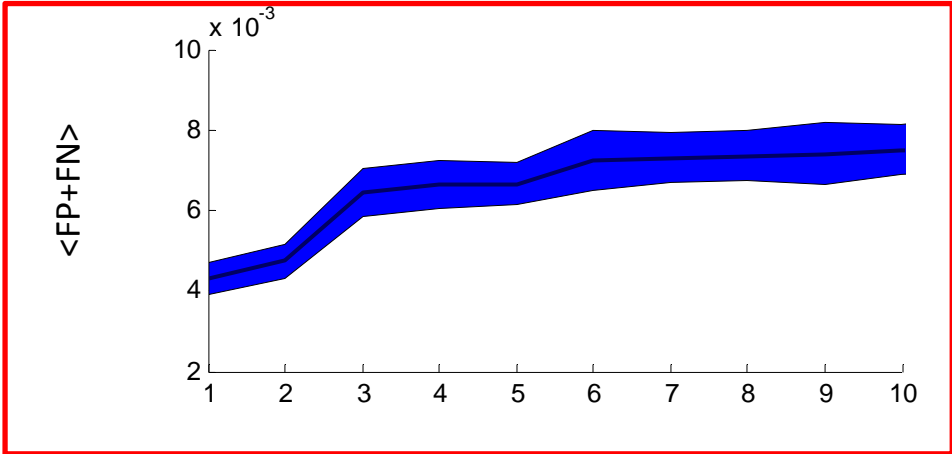

**C**

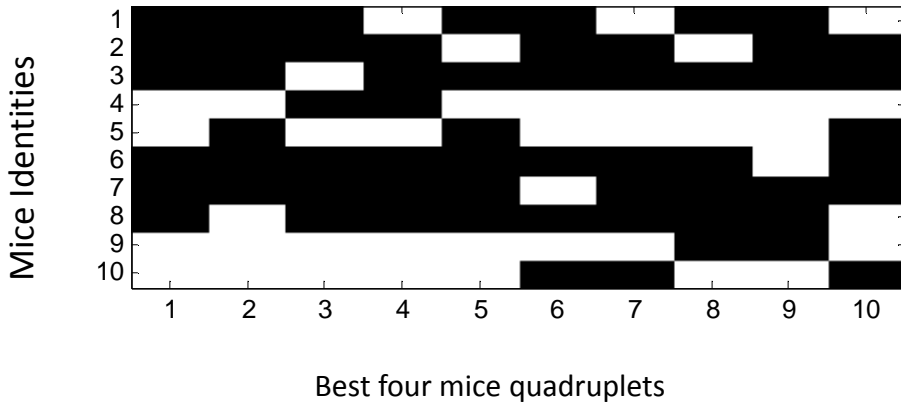

## Supplementary Figure 4

Exp 2, first dark cycle

Frame 1279483

Frame 1279883

Frame 1280183

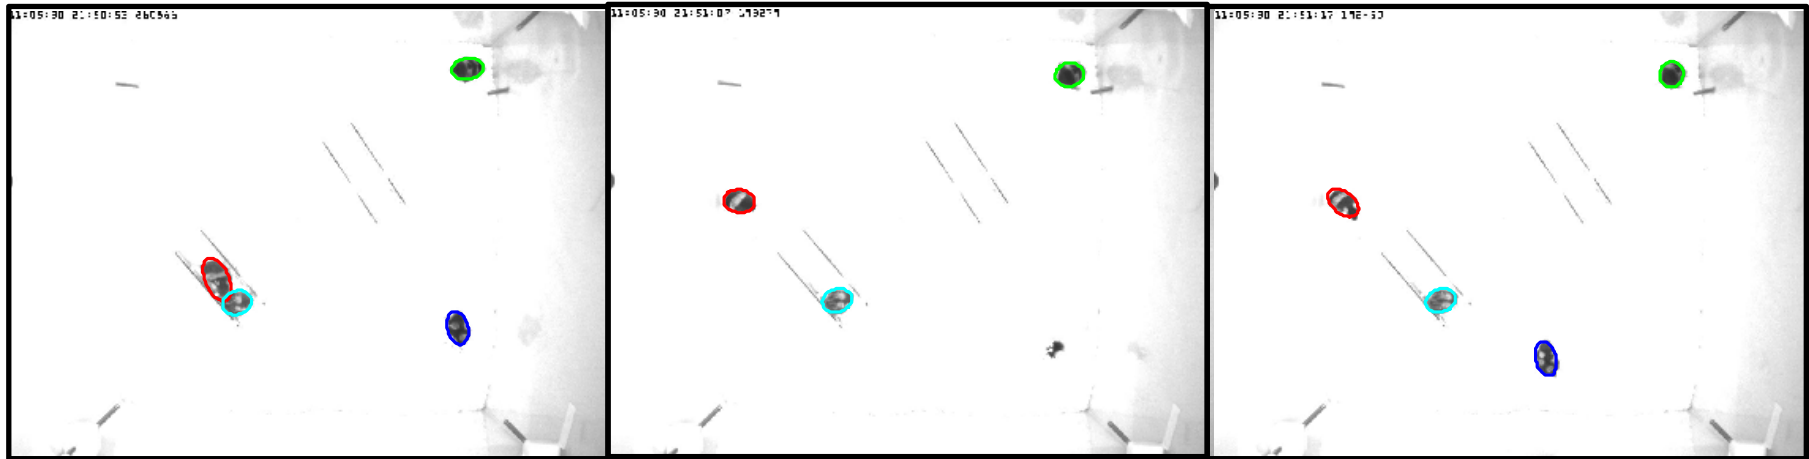

Exp 2, third light cycle

Frame 24209

Frame 24409

Frame 32589

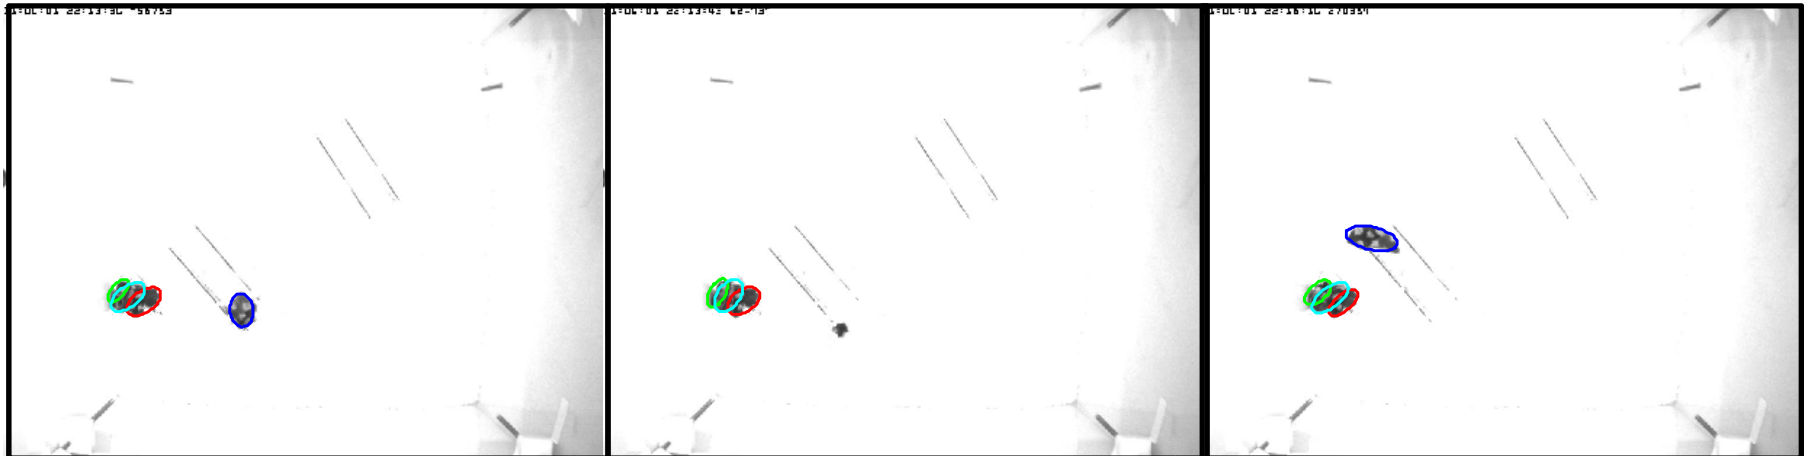

Supplementary Figure 5

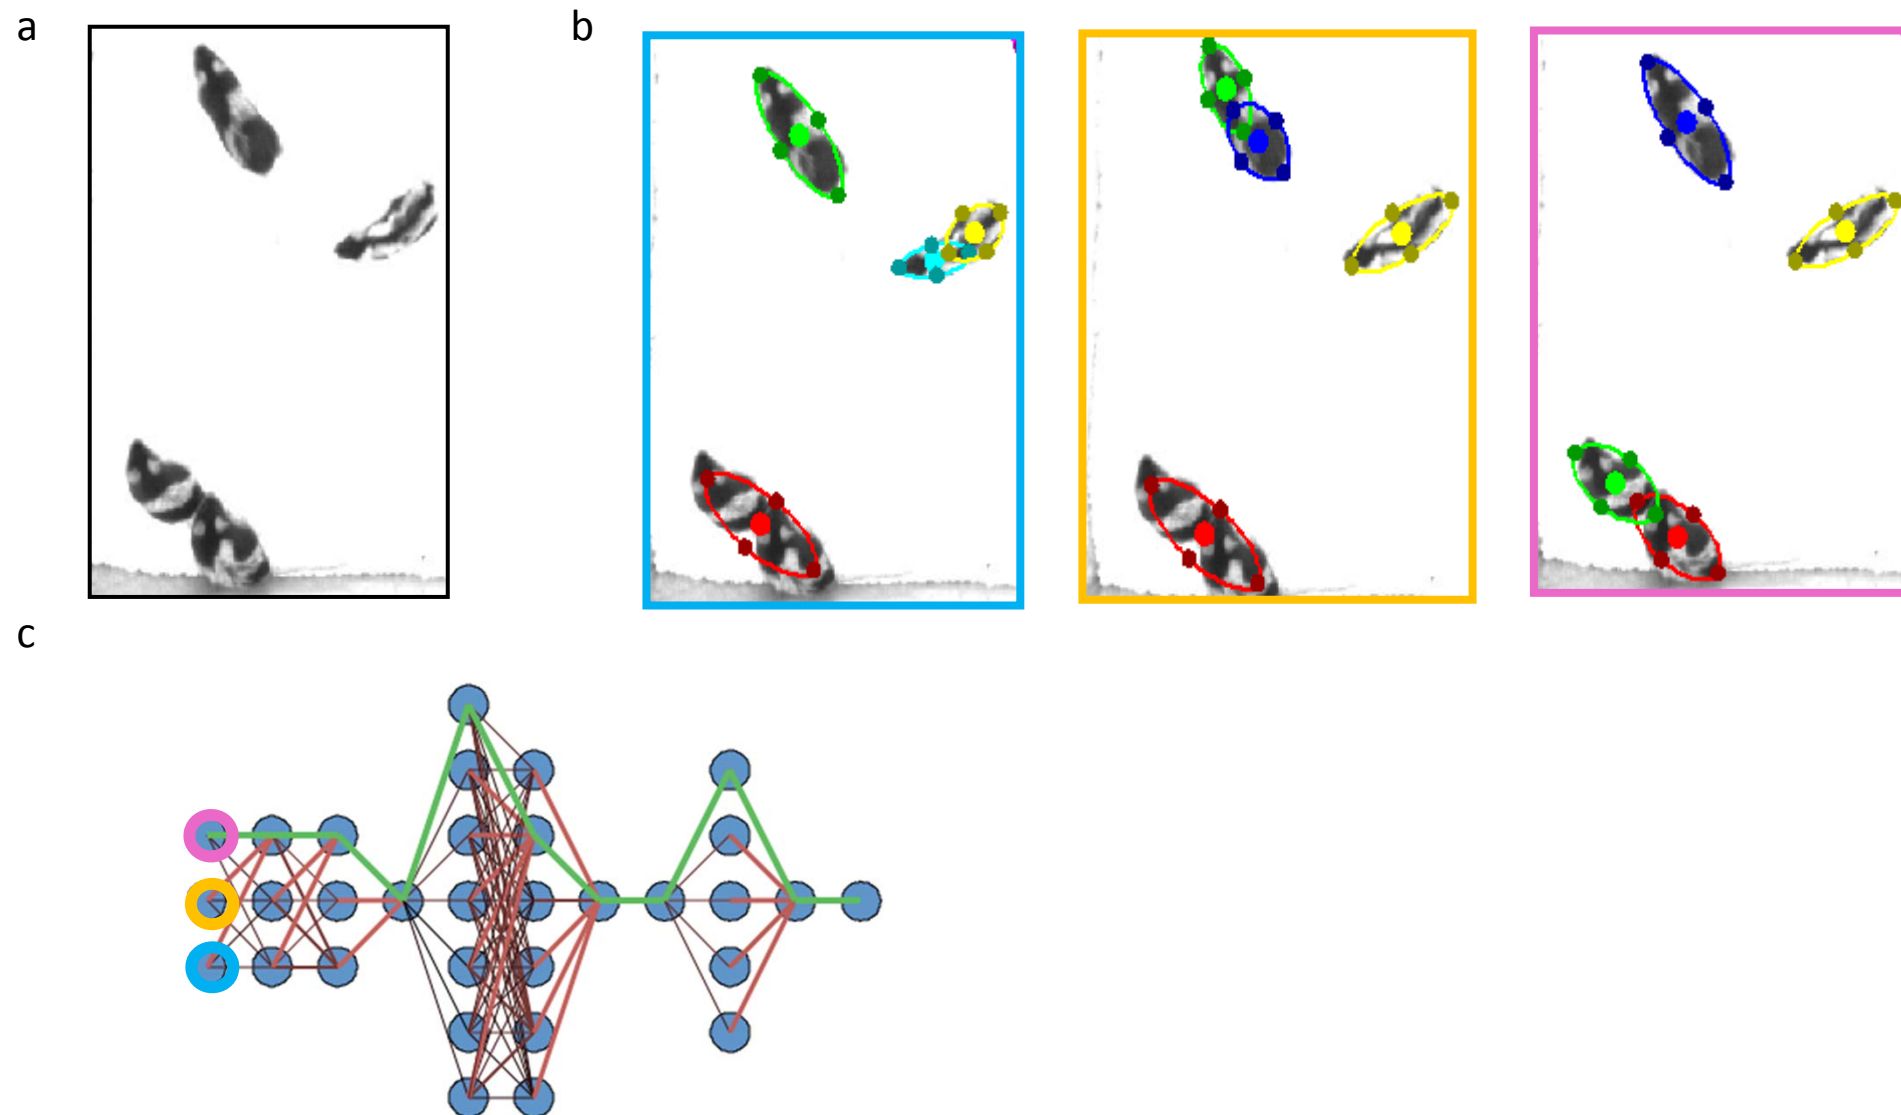

## Supplementary Figure 6

**a**

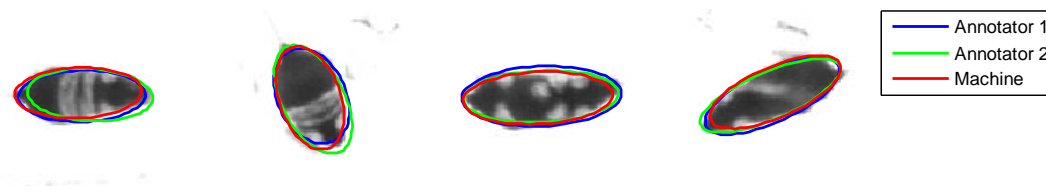

**b**

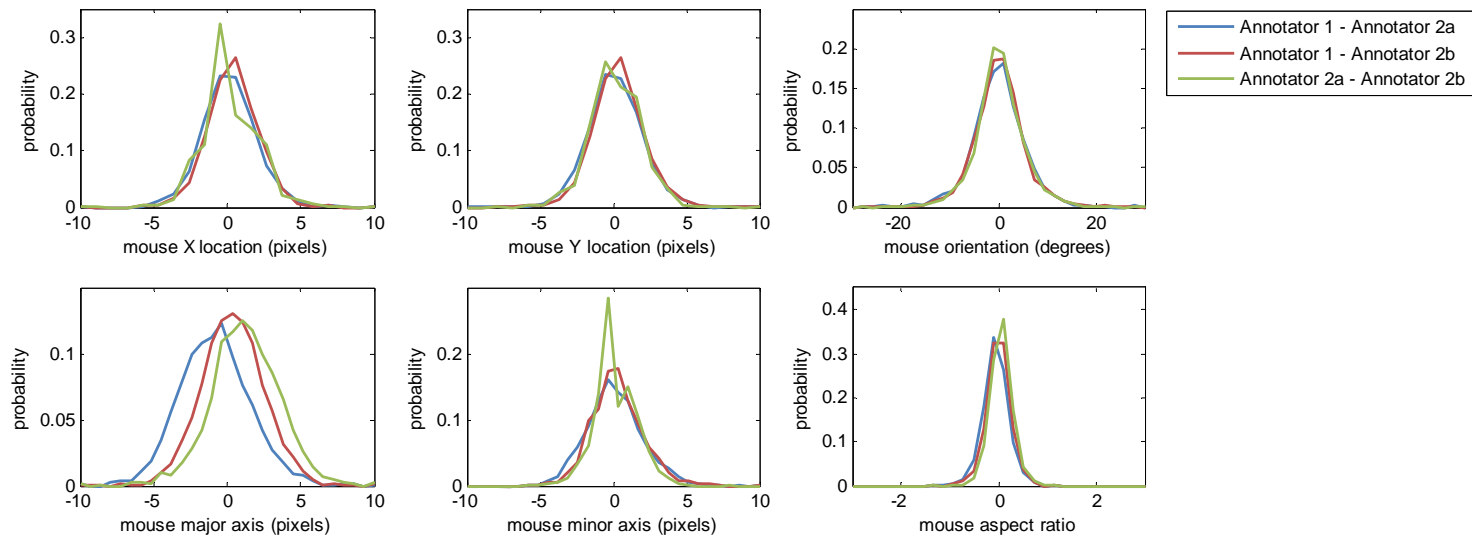

**c**

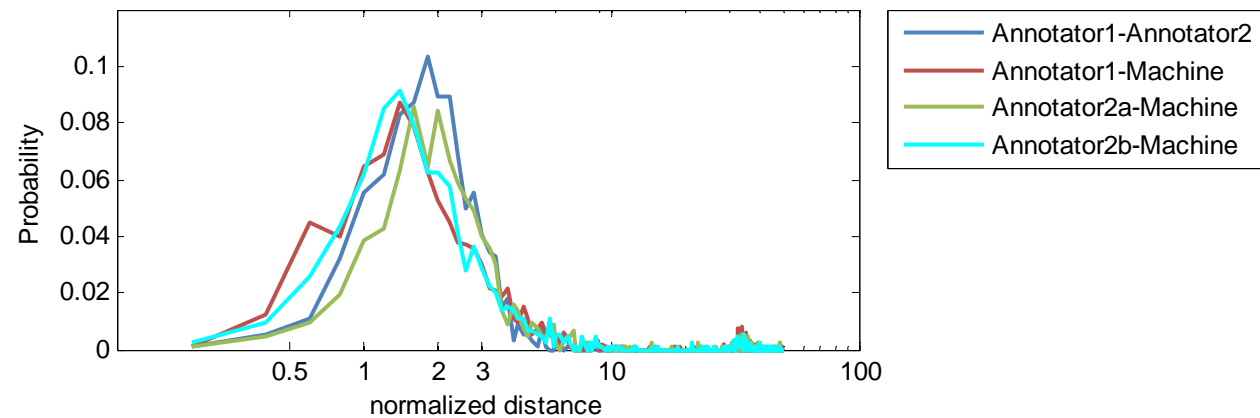

## Supplementary Figure 7

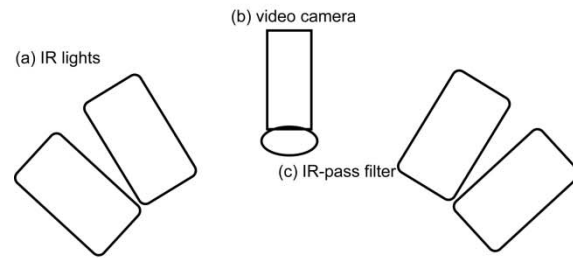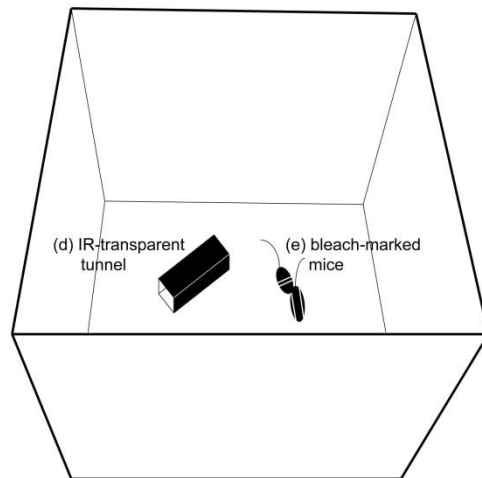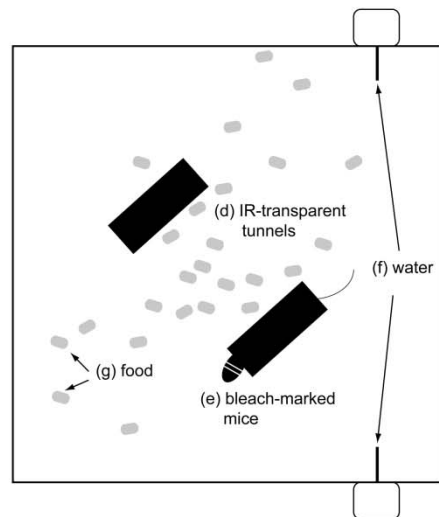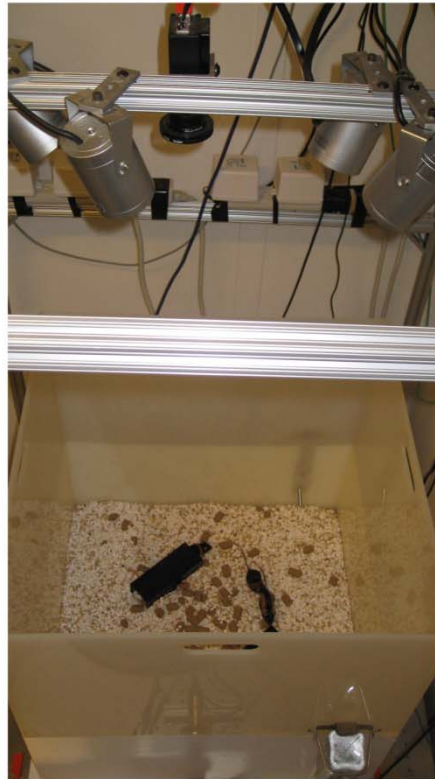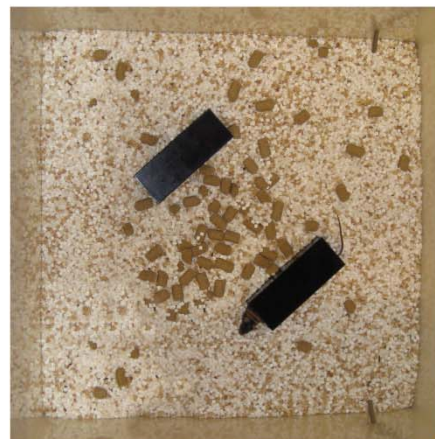

## Supplementary Figure 8

Exp 1

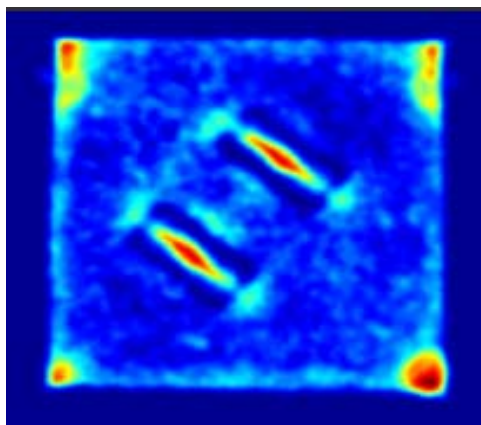

Exp 2

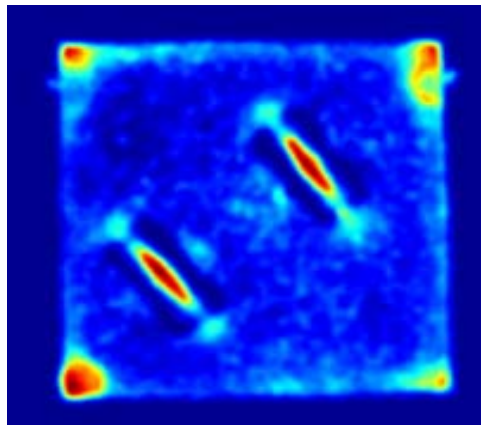

Exp 3

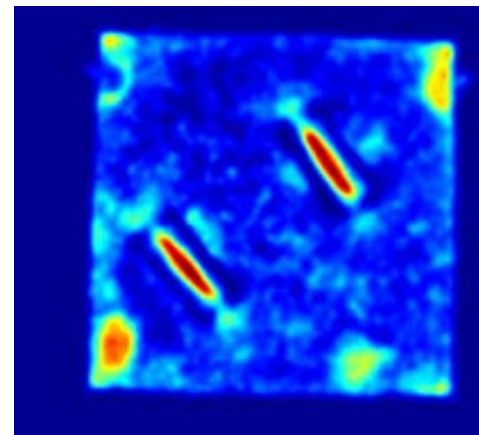

Exp 4

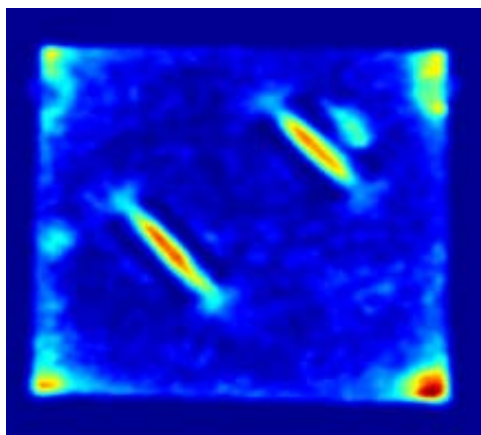

Exp 5

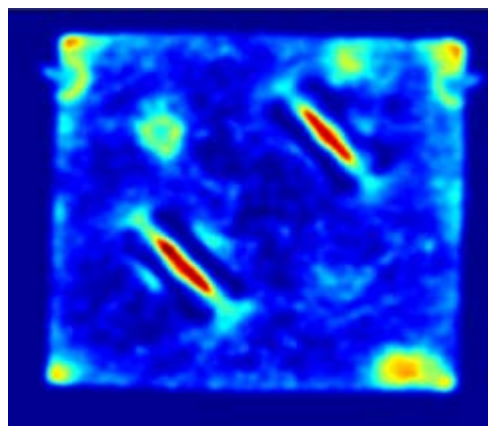

Exp 6

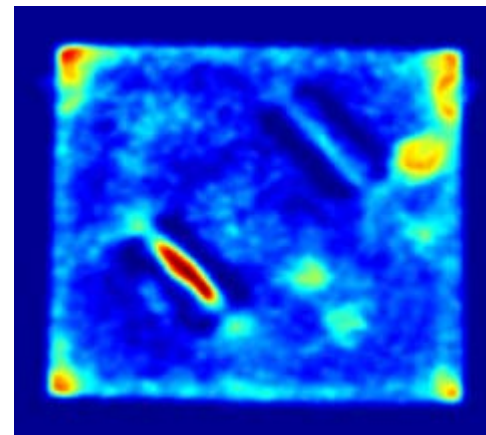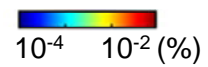



## Supplementary Figure 9

**a**

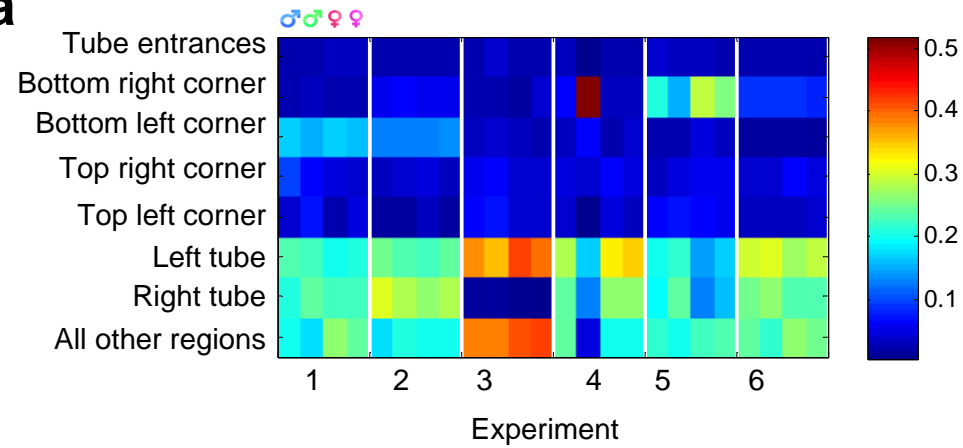

**b**

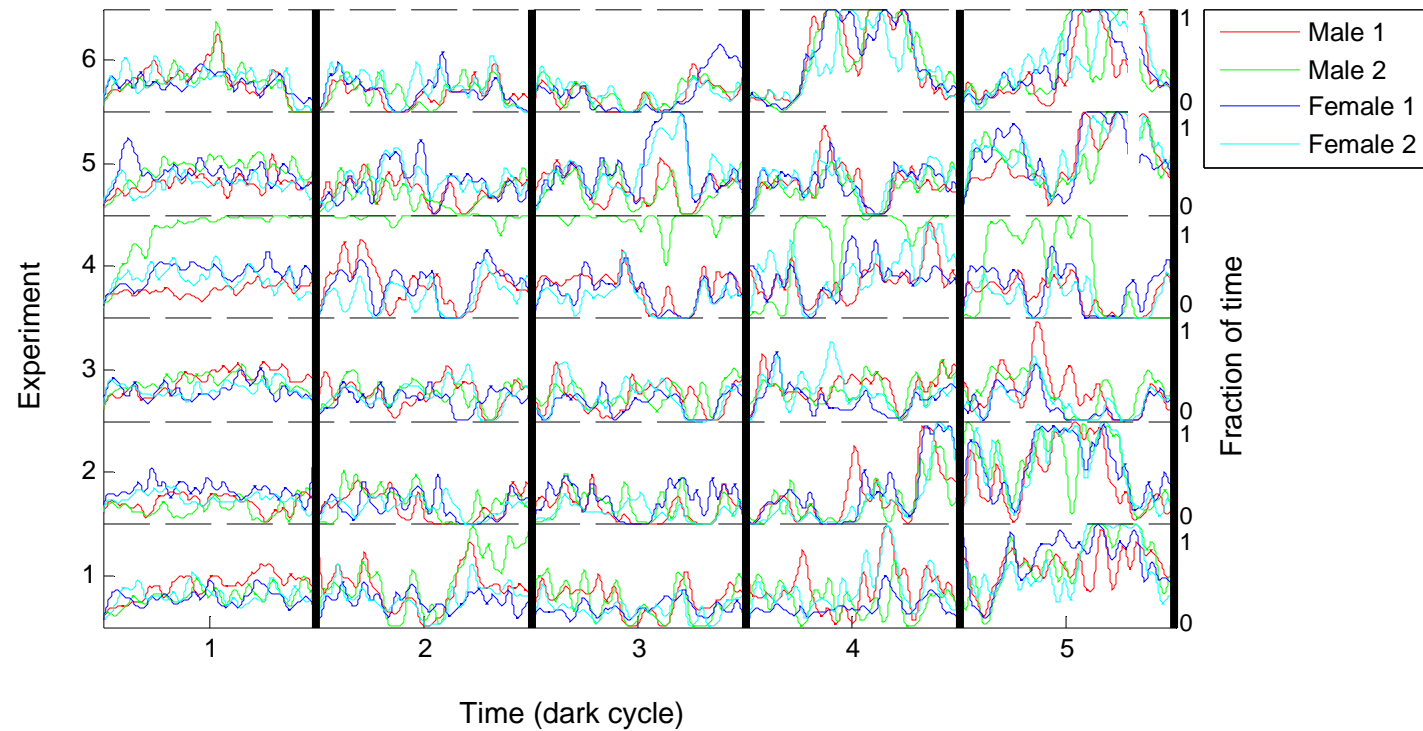

Supplementary figure 10

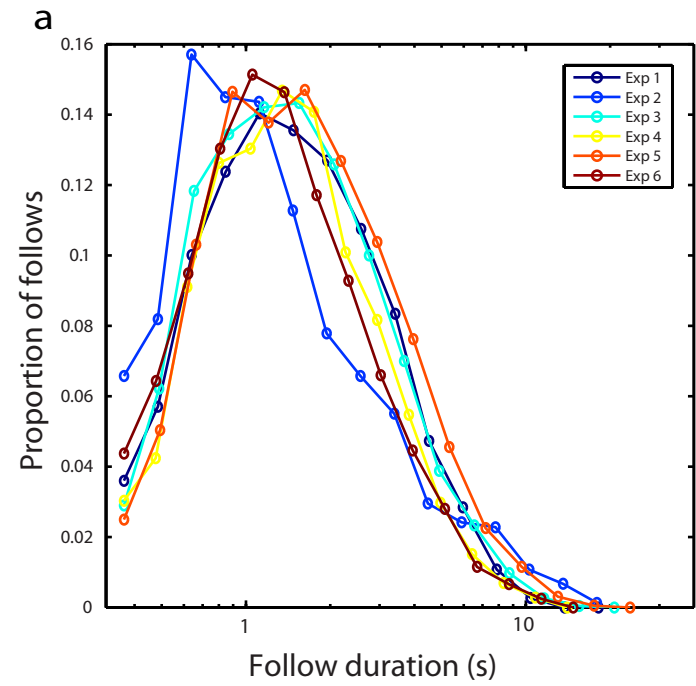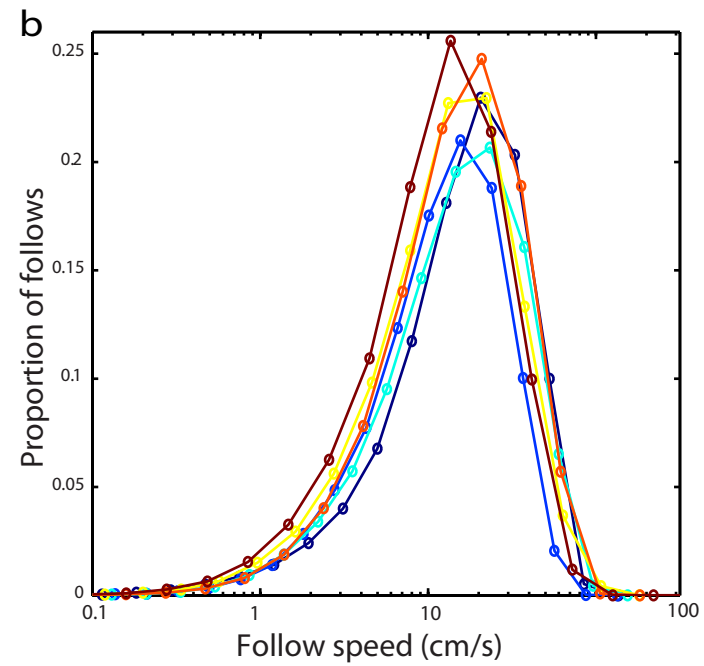

## Supplementary Figure 11

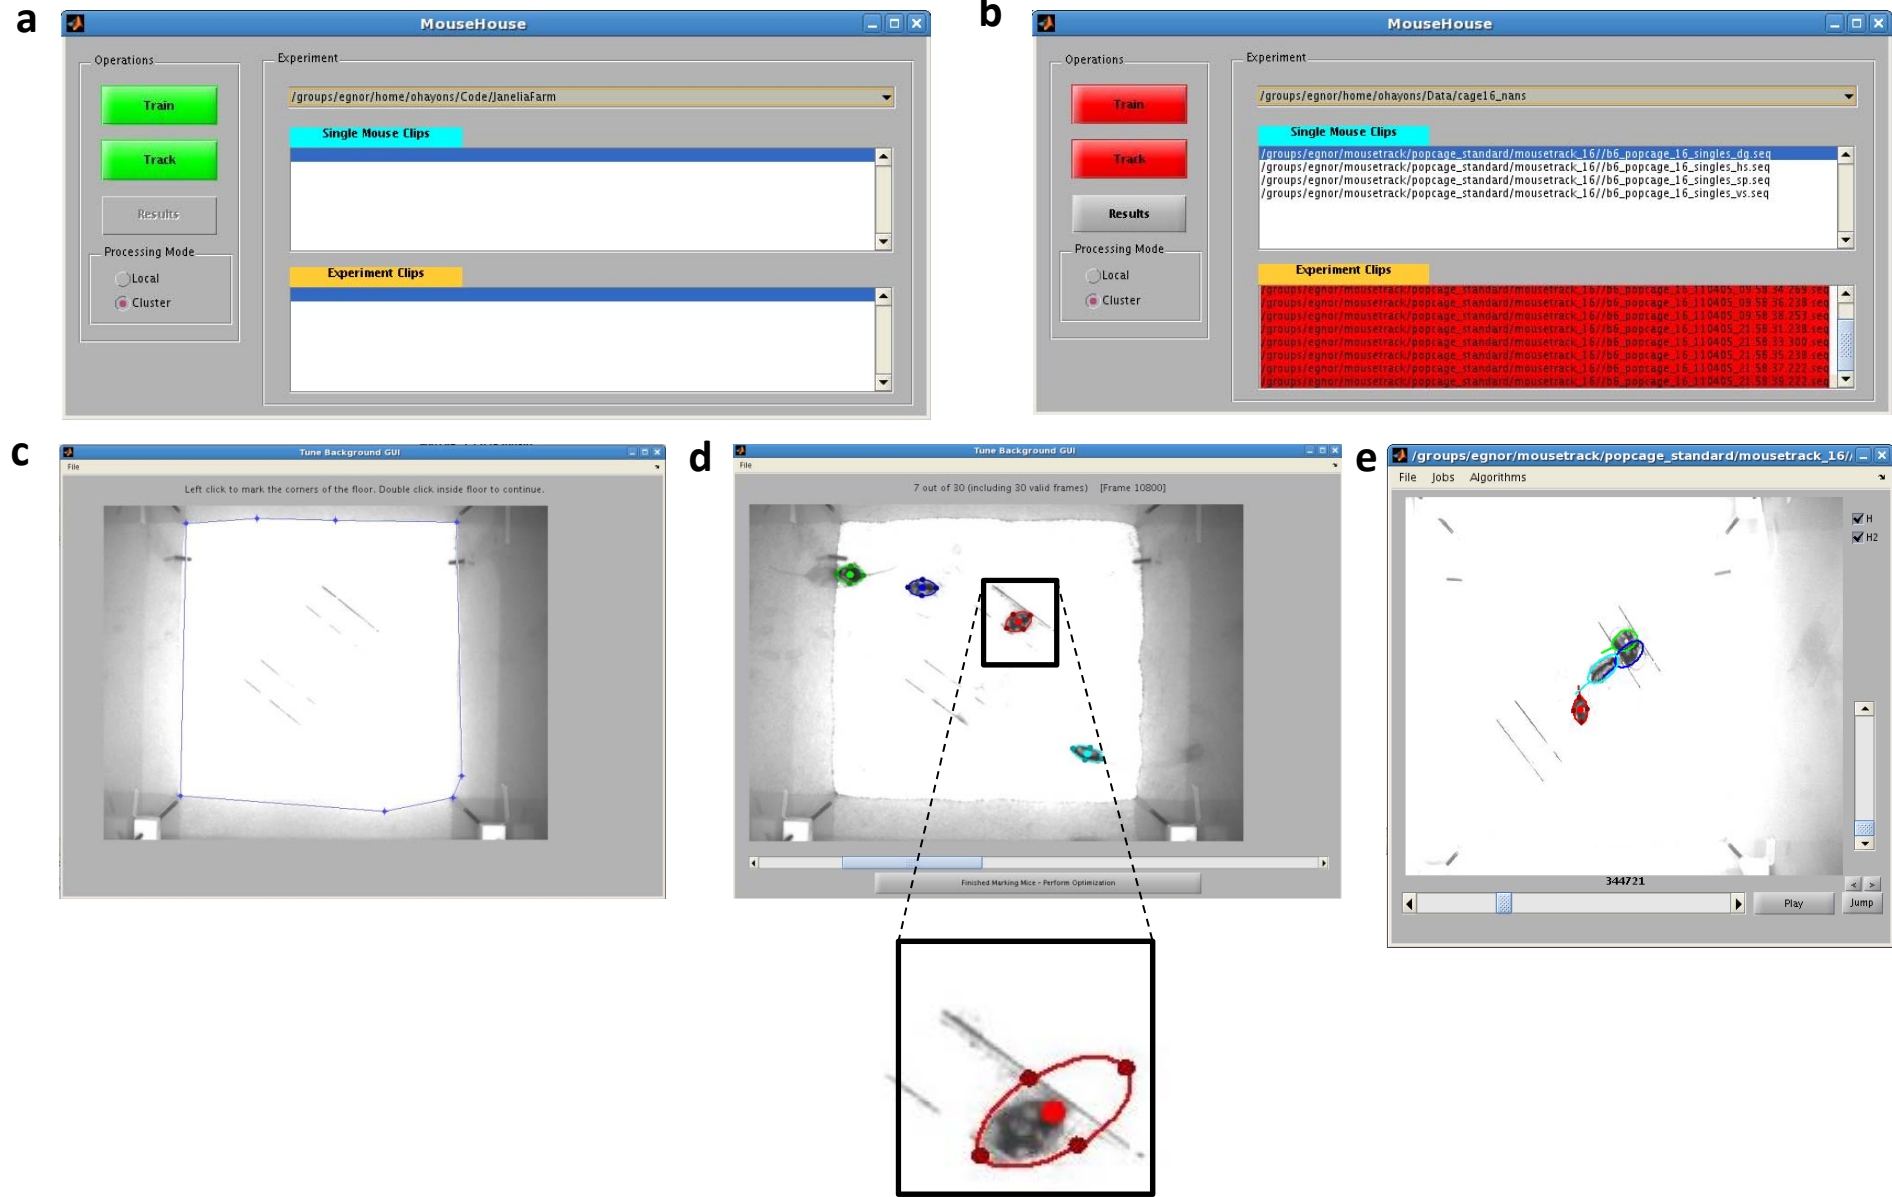

Supplementary Figure 12

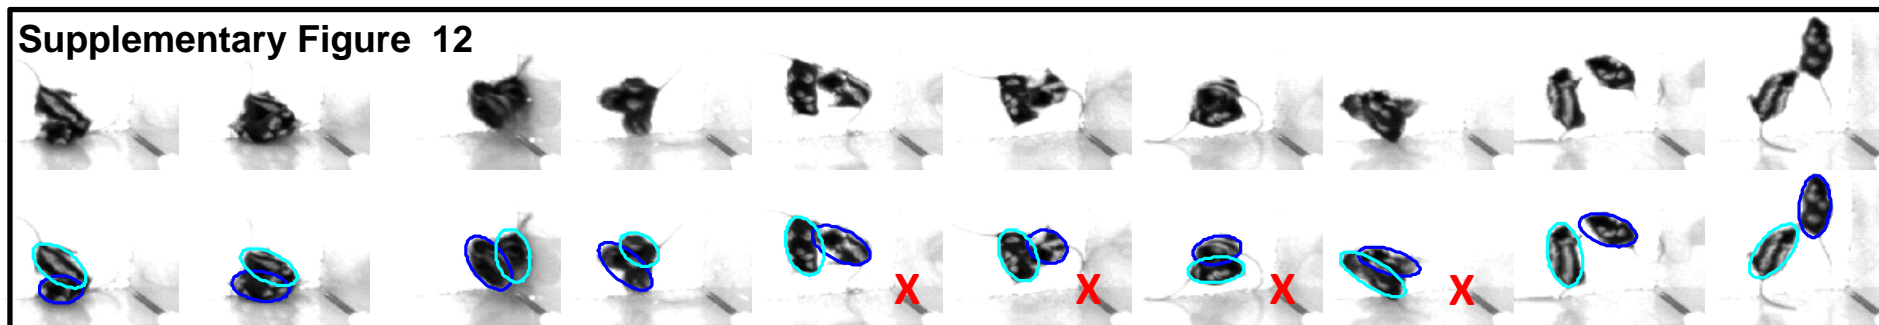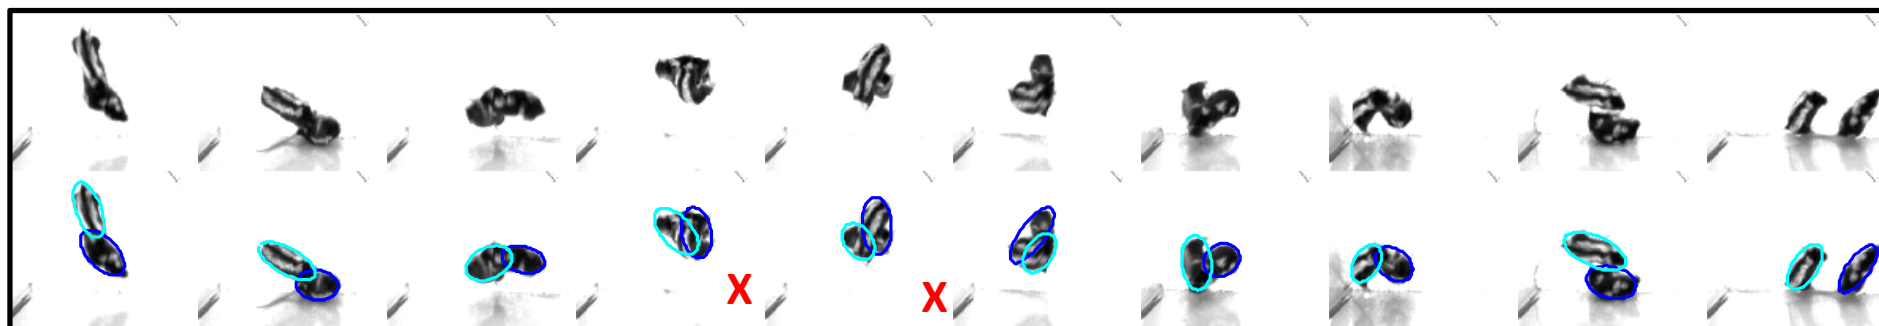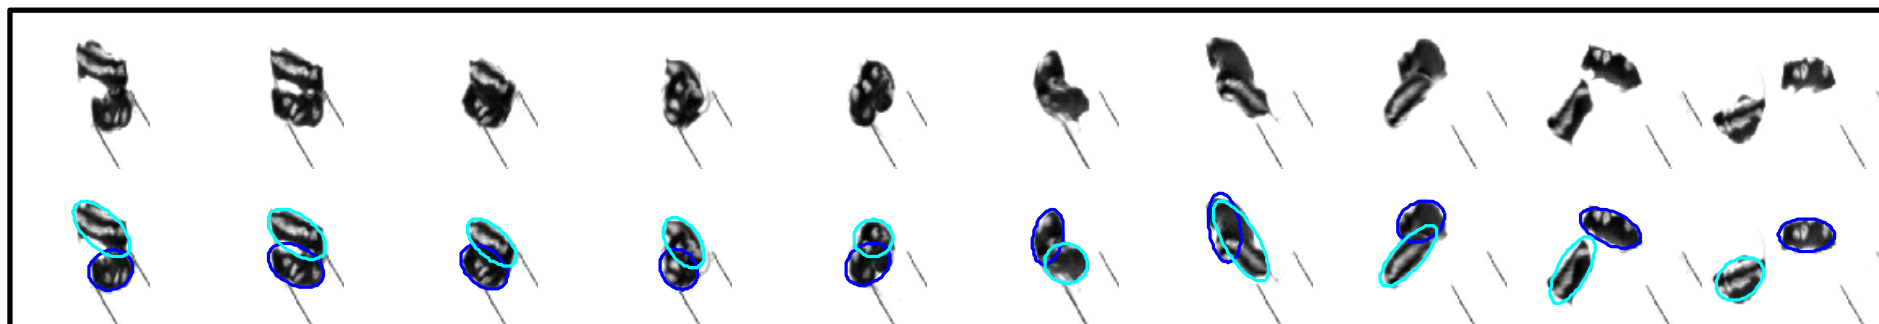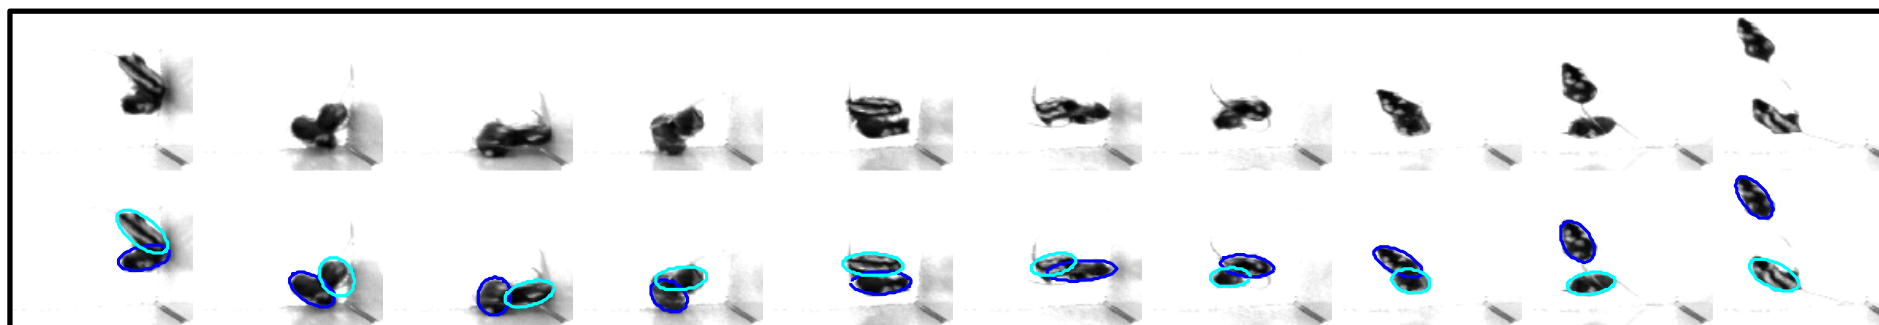

Supplement: mmc2 [file mmc2.pdf]
